# Supplementary material for: Feasibility of Efficient, Direct, Butanol Production from Food Waste without Nutrient Supplement by Clostridium saccharoperbutylacetonicum N1-4
Source: MDPI journal article supplement (doi:10.3390/su15076061), 2023-03-31
Supplement: s1 [file s1]

Archive with 1 entries (1 files):
- sustainability-2243322-supplementary.pdf
