# Supplementary material for: Feasibility of Efficient, Direct, Butanol Production from Food Waste without Nutrient Supplement by Clostridium saccharoperbutylacetonicum N1-4
Source: MDPI journal article supplement (doi:10.3390/su15076061), 2023-03-31
Supplement: s1 [file s1 › sustainability-2243322-supplementary.pdf]

## Supporting Information for

### **Feasibility of efficient direct butanol production from food waste without nutrient supplement by *Clostridium* *saccharoperbutylacetonicum* N1-4**

**Xiaona Wang<sup>a,1</sup>, Haishu Sun<sup>a,1</sup>, Yonglin Wang<sup>a</sup>, Fangxia Wang<sup>a</sup>, Wenbin Zhu<sup>a</sup>,  
Chuanfu Wu<sup>a,b</sup>, Qunhui Wang<sup>a,b</sup>, Ming Gao<sup>a,b,\*</sup>**

*<sup>a</sup> Department of Environmental Engineering, School of Energy and Environmental Engineering, University of Science and Technology Beijing, 30 Xueyuan Road, Haidian District, Beijing 100083, China*

*<sup>b</sup> Beijing Key Laboratory on Resource-oriented Treatment of Industrial Pollutants, University of Science and Technology Beijing, 30 Xueyuan Road, Haidian District, Beijing 10083, China*

<sup>1</sup>Xiaona Wang and Haishu Sun contributed equally to this work.

*\* Correspondence to: Ming Gao*

*Department of Environmental Science and Engineering, University of Science and Technology Beijing, Beijing Key Laboratory on Resource-oriented Treatment of Industrial Pollutants, 30 Xueyuan Road, Haidian District, Beijing 100083, China, TEL/FAX: +86-(010)-6233-2778,  
E-mail: gaoming402@gmail.com*

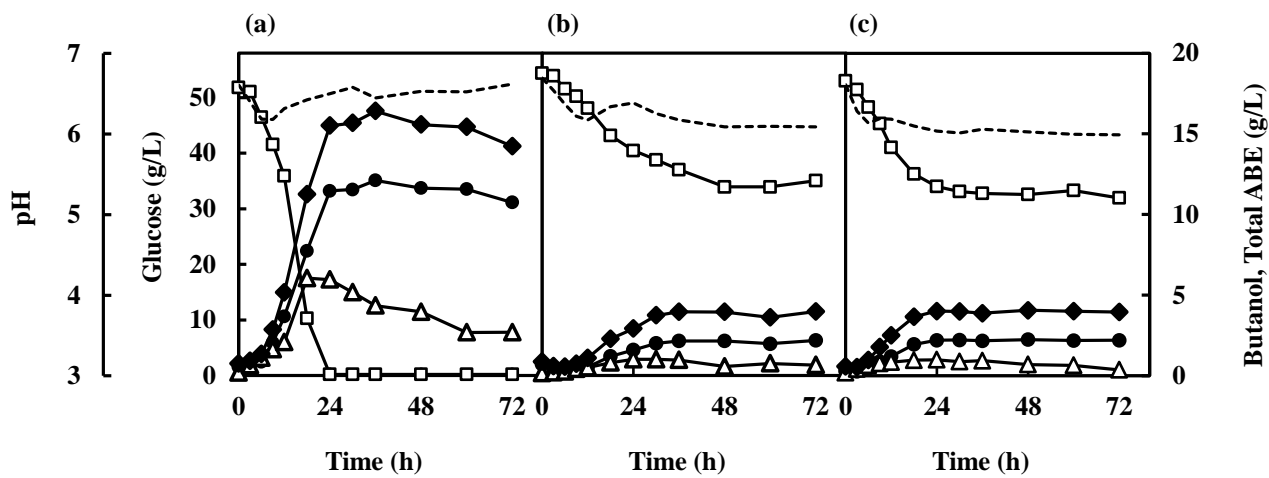

**Figure. S1.** Time course of batch culture with different ABE-producing clostridia using 50 g/L glucose as substrate. (a) *Clostridium saccharoperbutylacetonicum* N1-4; (b) *Clostridium acetobutylicum* ATCC 824; (c) *Clostridium beijerinckii* NCIMB 8052. □, glucose concentration; △, dry cell weight; ●, butanol concentration; ◆, total solvents concentration; dashed line, pH.

**Table S1.** Solvents production by different ABE-producing clostridia using glucose as substrate

| Strains                                   | Max. solvents production (g/L) |         |         |           | Glucose consumption (g/L) | Butanol yield (C-mol/C-mol) | Max. butanol production rate <sup>a</sup> (g/L/h) |
|-------------------------------------------|--------------------------------|---------|---------|-----------|---------------------------|-----------------------------|---------------------------------------------------|
|                                           | Acetone                        | Butanol | Ethanol | Total ABE |                           |                             |                                                   |
| <i>C. saccharoperbutylacetonicum</i> N1-4 | 3.81                           | 12.1    | 0.483   | 16.4      | 51.6                      | 0.364                       | 0.679 (12–18 h)                                   |
| <i>C. acetobutylicum</i> ATCC 824         | 1.55                           | 2.15    | 0.273   | 3.95      | 20.5                      | 0.134                       | 0.112 (12–18 h)                                   |
| <i>C. beijerinckii</i> NCIMB 8052         | 1.76                           | 2.25    | 0.0787  | 4.06      | 20.4                      | 0.155                       | 0.125 (12–18 h)                                   |

Batch cultures were performed using *C. saccharoperbutylacetonicum* N1-4 (30°C), *C. acetobutylicum* ATCC 824 (37°C) and *C. beijerinckii* NCIMB 8052 (37°C) respectively for 72 h in TYA medium containing 50 g/L glucose (working volume, 300 mL; initial dry cell weight, around 0.20 g/L).

<sup>a</sup> Butanol production rate (g/L/h) =  $(C_2 - C_1) / (t_2 - t_1)$ , where  $C$  is the butanol concentration (g/L),  $t$  is the sampling time (h); the period for the calculation is shown in the following parenthesis.

## Native starch is composed of amylose and amylopectin

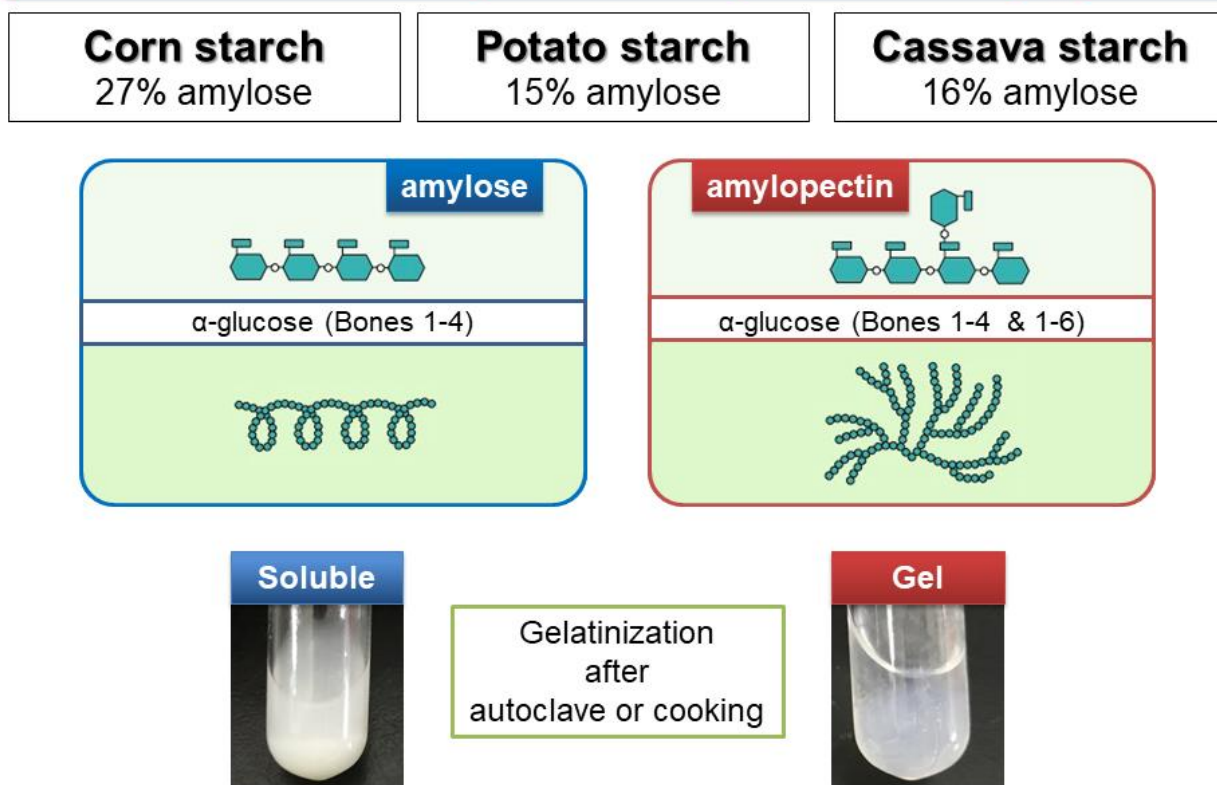

**Figure. S2.** The experimental phenomenon of amylose and amylopectin gelatinization after autoclave in the batch cultures (preparation of starchy carbon source in the text tube experiments).
